# Supplementary material
Source: PubMed Central journal article supplement (PMC5417824)
Supplement: 10.1074_M116.064733_mcp.M116.064733-1.pdf [file 10.1074_M116.064733_mcp.M116.064733-1.pdf]

## FIGURES LEGENDS

**Supplemental Figure 1:** MS/MS fragmentation of the peptides allowing assignment of two distinct IGHG3 AA alleles for the same NP49 sample

Left panel: MS/MS fragmentation of the tryptic peptide R.WQEGNVFSCSVMHEALHNR.F from the NP49 purified IgG sample and assignable to IGHG3\*03, as listed in the Table 2; Right panel: MS/MS fragmentation of the tryptic peptide R.WQQGNIFSCSVMHEALHNHYTQK.S from the NP49 purified IgG sample and assignable to IGHG3\*17\*18\*19, as listed in the Table 2.

**Supplemental Figure 2:** MS/MS fragmentation of a putatively new IGHG4 peptide identified in two distinct samples of purified IgG

Left panel: MS/MS fragmentation of the tryptic peptide R.VVSVLTILHQDWLNGK.E included in the amino acid sequence FMN|AS50|G4|V308I|N325H|Q355R|T394|L410 from the AS50 purified IgG sample, as listed in the Supplemental Table S1; Right panel: MS/MS fragmentation of the tryptic peptide R.VVSVLTILHQDWLNGK.E included in the amino acid sequence FMN|PA16|G4|V308I|N325H|Q355R|T394|L410 from the PA16 purified IgG sample, as listed in the Supplemental Table S1.

**Supplemental Table S1:** Database of IGHG CH2 and CH3-CHS amino acid sequences from the 10 patients included in the study (60 sequences; 13,004 amino acids)

**>FMN|AS50|G1|02<sup>a</sup>**

APELLGGPSVFLFPPKPKDTLMISRTPEVTCVVVDVSHEDPEVKFNWYVDGVEVHNAKTKPREEQYNSTYRVVSVLTVLHQDWLNGKEYKCKVSNKALPAPIEKTISKAKGQPREPQVYTLPPSRDELTKNQVSLTCLVKGFYPSDIAVEWESNGQPENNYKTTTPVLDSGDSFFLYSKLTVDKSRWQQGNVFSCSVMHEALHNHYTQKSLSLSPGK

**>FMN|AS50|G2|06**

APPVAGPSVFLFPPKPKDTLMISRTPEVTCVVVDVSHEDPEVQFNWYVDGVEVHNAKTKPREEQFNSTFRVSVLTVVHQDWLNGKEYKCKVSNKGLPAPIEKTISKTKGQPREPQVYTLPPSREEMTKNQVSLTCLVKGFYPSDISVEWESNGQPENNYKTTTPMLDSGDSFFLYSKLTVDKSRWQQGNVFSCSVMHEALHNHYTQKSLSLSPGK

**>FMN|AS50|G3|03**

APELLGGPSVFLFPPKPKDTLMISRTPEVTCVVVDVSHEDPEVQFKWYVDGVEVHNAKTKPREEQYNSTFRVSVLTVLHQDWLNGKEYKCKVSNKALPAPIEKTISKTKGQPREPQVYTLPPSREEMTKNQVSLTCLVKGFYPSDIAVEWESSGQPENNYNTTPVLDSGDSFFLYSRLTVDKSRWQEGNVFSCSVMHEALHNRFTQKSLSLSPGK

**>FMN|AS50|G3|13**

APELLGGPSVFLFPPKPKDTLMISRTPEVTCVVVDVSHEDPEVQFKWYVDGVEVHNAKTKPREEQYNSTFRVSVLTVLHQDWLNGKEYKCKVSNKALPAPIEKTISKTKGQPREPQVYTLPPSREEMTKNQVSLTCLVKGFYPSDIAVEWESSGQPENNYKTTTPMLDSGDSFFLYSKLTVDKSRWQEGNIFSCSVMHEALHNRFTQKSLSLSPGK

**>FMN|AS50|G4|04**

APEFLGGPSVFLFPPKPKDTLMISRTPEVTCVVVDVSQEDPEVQFNWYVDGVEVHNAKTKPREEQFNSTYRVVSVLTVLHQDWLNGKEYKCKVSNKGLPSSIEKTISKAKGQPREPQVYTLPPSQEEMTKNQVSLTCLVKGFYPSDIAVEWESNGQPENNYKTTTPVLDSGDSFFLYSRLTVDKSRWQEGNVFSCSVMHEALHNHYTQKSLSLGLGK

**>FMN|AS50|G4|V308I|N325H|Q355R|T394|L410<sup>b</sup> (FMN\_AS50\_IGHG4\*06\_CH2\_I91\_CH2\_H108\_CH3\_R11)<sup>c</sup>**

APEFLGGPSVFLFPPKPKDTLMISRTPEVTCVVVDVSQEDPEVQFNWYVDGVEVHNAKTKPREEQFNSTYRVVSVLTVLHQDWLNGKEYKCKVSHKGLPSSIEKTISKAKGQPREPQVYTLPPSREEMTKNQVSLTCLVKGFYPSDIAVEWESNGQPENNYKTTTPVLDSGDSFFLYSRLTVDKSRWQEGNVFSCSVMHEALHNHYTQKSLSLGLGK

**>FMN|NP49|G1|02**

APELLGGPSVFLFPPKPKDTLMISRTPEVTCVVVDVSHEDPEVKFNWYVDGVEVHNAKTKPREEQYNSTYRVVSVLTVLHQDWLNGKEYKCKVSNKALPAPIEKTISKAKGQPREPQVYTLPPSRDELTKNQVSLTCLVKGFYPSDIAVEWESNGQPENNYKTTTPVLDSGDSFFLYSKLTVDKSRWQQGNVFSCSVMHEALHNHYTQKSLSLSPGK

**>FMN|NP49|G2|06**

APPVAGPSVFLFPPKPKDTLMISRTPEVTCVVVDVSHEDPEVQFNWYVDGVEVHNAKTKPREEQFNSTFRVSVLTVVHQDWLNGKEYKCKVSNKGLPAPIEKTISKTKGQPREPQVYTLPPSREEMTKNQVSLTCLVKGFYPSDISVEWESNGQPENNYKTTTPMLDSGDSFFLYSKLTVDKSRWQQGNVFSCSVMHEALHNHYTQKSLSLSPGK

**>FMN|NP49|G3|03**

APELLGGPSVFLFPPKPKDTLMISRTPEVTCVVVDVSHEDPEVQFKWYVDGVEVHNAKTKPREEQYNSTFRVSVLTVLHQDWLNGKEYKCKVSNKALPAPIEKTISKTKGQPREPQVYTLPPSREEMTKNQVSLTCLVKGFYPSDIAVEWESSGQPENNYNTTPVLDSGDSFFLYSRLTVDKSRWQEGNVFSCSVMHEALHNRFTQKSLSLSPGK

**>FMN|NP49|G3|01040510<sup>d</sup>**

APELLGGPSVFLFPPKPKDTLMISRTPEVTCVVVDVSHEDPEVQFKWYVDGVEVHNAKTKPREEQYNSTFRVSVLTVLHQDWLNGKEYKCKVSNKALPAPIEKTISKTKGQPREPQVYTLPPSREEMTKNQVSLTCLVKGFYPSDIAVEWESSGQPENNYNTTPMLDSGDSFFLYSKLTVDKSRWQQGNIFSCSVMHEALHNRFTQKSLSLSPGK

**>FMN|NP49|G4|04**

APEFLGGPSVFLFPPKPKDTLMISRTPEVTCVVVDVSQEDPEVQFNWYVDGVEVHNAKTKPREEQFNSTYRVVSVLTVLHQDWLNGKEYKCKVSNKGLPSSIEKTISKAKGQPREPQVYTLPPSQEEM  
TKNQVSLTCLVKGFYPSDIAVEWESNGQPENNYKTTPVLDSGFFLYSRLTVDKSRWQEGNVFSCVMHEALHNHYTQKSLSLSPGK

**>FMN|NP49|G4|0104|E233<sup>e</sup>**

APEFLGGPSVFLFPPKPKDTLMISRTPEVTCVVVDVSQEDPEVQFNWYVDGVEVHNAKTKPREEQFNSTYRVVSVLTVLHQDWLNGKEYKCKVSNKGLPSSIEKTISKAKGQPREPQVYTLPPSQEEM  
TKNQVSLTCLVKGFYPSDIAVEWESNGQPENNYKTTPVLDSGFFLYSRLTVDKSRWQEGNVFSCVMHEALHNHYTQKSLSLSPGK

**>FMN|PA01|G1|02**

APELLGGPSVFLFPPKPKDTLMISRTPEVTCVVVDVSHEDPEVKFNWYVDGVEVHNAKTKPREEQYNSTYRVVSVLTVLHQDWLNGKEYKCKVSNKALPAPIEKTISKAKGQPREPQVYTLPPSRDEL  
TKNQVSLTCLVKGFYPSDIAVEWESNGQPENNYKTTPVLDSGFFLYSRLTVDKSRWQQGNVFSCVMHEALHNHYTQKSLSLSPGK

**>FMN|PA01|G2|01030405|V308|T394**

APPVAGPSVFLFPPKPKDTLMISRTPEVTCVVVDVSHEDPEVQFNWYVDGVEVHNAKTKPREEQFNSTFRVVS LTVVHQDWLNGKEYKCKVSNKGLPAPIEKTISKTKGQPREPQVYTLPPSREEM  
TKNQVSLTCLVKGFYPSDIAVEWESNGQPENNYKTTPMLDSGSDGFFLYSRLTVDKSRWQQGNVFSCVMHEALHNHYTQKSLSLSPGK

**>FMN|PA01|G2|V308|V309L|T394 (FMN\_PA01\_IGHG2\*07\_CH2\_L92)<sup>c</sup>**

APPVAGPSVFLFPPKPKDTLMISRTPEVTCVVVDVSHEDPEVQFNWYVDGVEVHNAKTKPREEQFNSTFRVVS LTVLHQDWLNGKEYKCKVSNKGLPAPIEKTISKTKGQPREPQVYTLPPSREEM  
TKNQVSLTCLVKGFYPSDIAVEWESNGQPENNYKTTPMLDSGSDGFFLYSRLTVDKSRWQQGNVFSCVMHEALHNHYTQKSLSLSPGK

**>FMN|PA01|G3|01040510**

APELLGGPSVFLFPPKPKDTLMISRTPEVTCVVVDVSHEDPEVQFKWYVDGVEVHNAKTKPREEQYNSTFRVVS LTVLHQDWLNGKEYKCKVSNKALPAPIEKTISKTKGQPREPQVYTLPPSREEM  
TKNQVSLTCLVKGFYPSDIAVEWESSGQPENNYNTTPMLDSGSDGFFLYSRLTVDKSRWQQGNIFSCVMHEALHNRFQKSLSLSPGK

**>FMN|PA01|G4|0104|E233**

APEFLGGPSVFLFPPKPKDTLMISRTPEVTCVVVDVSQEDPEVQFNWYVDGVEVHNAKTKPREEQFNSTYRVVSVLTVLHQDWLNGKEYKCKVSNKGLPSSIEKTISKAKGQPREPQVYTLPPSQEEM  
TKNQVSLTCLVKGFYPSDIAVEWESNGQPENNYKTTPVLDSGFFLYSRLTVDKSRWQEGNVFSCVMHEALHNHYTQKSLSLSPGK

**>FMN|PA01|G4|0104|E233|T250**

APEFLGGPSVFLFPPKPKDTLMISRTPEVTCVVVDVSQEDPEVQFNWYVDGVEVHNAKTKPREEQFNSTYRVVSVLTVLHQDWLNGKEYKCKVSNKGLPSSIEKTISKAKGQPREPQVYTLPPSQEEM  
TKNQVSLTCLVKGFYPSDIAVEWESNGQPENNYKTTPVLDSGFFLYSRLTVDKSRWQEGNVFSCVMHEALHNHYTQKSLSLSPGK

**>FMN|PA07|G1|02**

APELLGGPSVFLFPPKPKDTLMISRTPEVTCVVVDVSHEDPEVKFNWYVDGVEVHNAKTKPREEQYNSTYRVVSVLTVLHQDWLNGKEYKCKVSNKALPAPIEKTISKAKGQPREPQVYTLPPSRDEL  
TKNQVSLTCLVKGFYPSDIAVEWESNGQPENNYKTTPVLDSGFFLYSRLTVDKSRWQQGNVFSCVMHEALHNHYTQKSLSLSPGK

**>FMN|PA07|G2|06**

APPVAGPSVFLFPPKPKDTLMISRTPEVTCVVVDVSHEDPEVQFNWYVDGVEVHNAKTKPREEQFNSTFRVVS LTVVHQDWLNGKEYKCKVSNKGLPAPIEKTISKTKGQPREPQVYTLPPSREEM  
TKNQVSLTCLVKGFYPSDISVEWESNGQPENNYKTTPMLDSGSDGFFLYSRLTVDKSRWQQGNVFSCVMHEALHNHYTQKSLSLSPGK

**>FMN|PA07|G2|01030405|V308**

APPVAGPSVFLFPPKPKDTLMISRTPEVTCVVVDVSHEDPEVQFNWYVDGVEVHNAKTKPREEQFNSTFRVVS LTVVHQDWLNGKEYKCKVSNKGLPAPIEKTISKTKGQPREPQVYTLPPSREEM  
TKNQVSLTCLVKGFYPSDIAVEWESNGQPENNYKTTPMLDSGSDGFFLYSRLTVDKSRWQQGNVFSCVMHEALHNHYTQKSLSLSPGK

**>FMN|PA07|G3|01040510**

APELLGGPSVFLFPPKPKDTLMISRTPEVTCVVVDVSHEDPEVQFKWYVDGVEVHNAKTKPREEQYNSTFRVVSVLTVLHQDWLNGKEYKCKVSNKALPAPIEKTISKTKGQPREPQVYTLPPSREEM  
TKNQVSLTCLVKGFYPSDIAVEWESSGPENNYNTTPPMLDSGDGSFFLYSKLTVDKSRWQQGNIFSCSV MHEALHNRFTQKSLSLSPGK

**>FMN|PA07|G3|13**

APELLGGPSVFLFPPKPKDTLMISRTPEVTCVVVDVSHEDPEVQFKWYVDGVEVHNAKTKPREEQYNSTFRVVSVLTVLHQDWLNGKEYKCKVSNKALPAPIEKTISKTKGQPREPQVYTLPPSREEM  
TKNQVSLTCLVKGFYPSDIAVEWESSGPENNYKTTTPPMLDSGDGSFFLYSKLTVDKSRWQEGNIFSCSV MHEALHNRFTQKSLSLSPGK

**>FMN|PA07|G4|V308I|N325H|L410 (FMN\_PA07\_IGHG4\*05\_CH2\_I91\_CH2\_H108) <sup>c</sup>**

APEFLGGPSVFLFPPKPKDTLMISRTPEVTCVVVDVSQEDPEVQFNWYVDGVEVHNAKTKPREEQFNSTYRVVSVLTVLHQDWLNGKEYKCKVSHKGLPSSIEKTISKAKGQPREPQVYTLPPSQEEM  
TKNQVSLTCLVKGFYPSDIAVEWESNGQPENNYKTTTPVLDSGDGSFFLYSRLTVDKSRWQEGNVFSCSV MHEALHNHYTQKSLSLSLGK

**>FMN|PA07|G4|0104|E233|T250**

APEFLGGPSVFLFPPKPKDTLMISRTPEVTCVVVDVSQEDPEVQFNWYVDGVEVHNAKTKPREEQFNSTYRVVSVLTVLHQDWLNGKEYKCKVSNKGLPSSIEKTISKAKGQPREPQVYTLPPSQEEM  
TKNQVSLTCLVKGFYPSDIAVEWESNGQPENNYKTTTPVLDSGDGSFFLYSRLTVDKSRWQEGNVFSCSV MHEALHNHYTQKSLSLSLGK

**>FMN|PA09|G1|02**

APELLGGPSVFLFPPKPKDTLMISRTPEVTCVVVDVSHEDPEVKFNWYVDGVEVHNAKTKPREEQYNSTYRVVSVLTVLHQDWLNGKEYKCKVSNKALPAPIEKTISKAKGQPREPQVYTLPPSRDEL  
TKNQVSLTCLVKGFYPSDIAVEWESNGQPENNYKTTTPVLDSGDGSFFLYSKLTVDKSRWQQGNV FSCSV MHEALHNHYTQKSLSLSPGK

**>FMN|PA09|G2|06**

APPVAGPSVFLFPPKPKDTLMISRTPEVTCVVVDVSHEDPEVQFNWYVDGVEVHNAKTKPREEQFNSTFRVVSVLTVVHQDWLNGKEYKCKVSNKGLPAPIEKTISKTKGQPREPQVYTLPPSREEM  
TKNQVSLTCLVKGFYPSDISVEWESNGQPENNYKTTTPMLDSGDGSFFLYSKLTVDKSRWQQGNV FSCSV MHEALHNHYTQKSLSLSPGK

**>FMN|PA09|G2|01030405|V308**

APPVAGPSVFLFPPKPKDTLMISRTPEVTCVVVDVSHEDPEVQFNWYVDGVEVHNAKTKPREEQFNSTFRVVSVLTVVHQDWLNGKEYKCKVSNKGLPAPIEKTISKTKGQPREPQVYTLPPSREEM  
TKNQVSLTCLVKGFYPSDIAVEWESNGQPENNYKTTTPMLDSGDGSFFLYSKLTVDKSRWQQGNV FSCSV MHEALHNHYTQKSLSLSPGK

**>FMN|PA09|G3|03**

APELLGGPSVFLFPPKPKDTLMISRTPEVTCVVVDVSHEDPEVQFKWYVDGVEVHNAKTKPREEQYNSTFRVVSVLTVLHQDWLNGKEYKCKVSNKALPAPIEKTISKTKGQPREPQVYTLPPSREEM  
TKNQVSLTCLVKGFYPSDIAVEWESSGPENNYNTTPVLDSGDGSFFLYSRLTVDKSRWQEGNV FSCSV MHEALHNRFTQKSLSLSPGK

**>FMN|PA09|G3|01040510**

APELLGGPSVFLFPPKPKDTLMISRTPEVTCVVVDVSHEDPEVQFKWYVDGVEVHNAKTKPREEQYNSTFRVVSVLTVLHQDWLNGKEYKCKVSNKALPAPIEKTISKTKGQPREPQVYTLPPSREEM  
TKNQVSLTCLVKGFYPSDIAVEWESSGPENNYNTTPPMLDSGDGSFFLYSKLTVDKSRWQQGNIFSCSV MHEALHNRFTQKSLSLSPGK

**>FMN|PA09|G4|04**

APEFLGGPSVFLFPPKPKDTLMISRTPEVTCVVVDVSQEDPEVQFNWYVDGVEVHNAKTKPREEQFNSTYRVVSVLTVLHQDWLNGKEYKCKVSNKGLPSSIEKTISKAKGQPREPQVYTLPPSQEEM  
TKNQVSLTCLVKGFYPSDIAVEWESNGQPENNYKTTTPVLDSGDGSFFLYSRLTVDKSRWQEGNV FSCSV MHEALHNHYTQKSLSLSLGK

**>FMN|PA09|G4|0104|E233**

APEFLGGPSVFLFPPKPKDTLMISRTPEVTCVVVDVSQEDPEVQFNWYVDGVEVHNAKTKPREEQFNSTYRVVSVLTVLHQDWLNGKEYKCKVSNKGLPSSIEKTISKAKGQPREPQVYTLPPSQEEM  
TKNQVSLTCLVKGFYPSDIAVEWESNGQPENNYKTTTPVLDSGDGSFFLYSRLTVDKSRWQEGNV FSCSV MHEALHNHYTQKSLSLSLGK

**>FMN|PA16|G1|02**

APELLGGPSVFLFPPKPKDTLMISRTPEVTCVVVDVSHEDPEVKFNWYVDGVEVHNAKTKPREEQYNSTYRVVSVLTVLHQDWLNGKEYKCKVSNKALPAPIEKTISKAKGQPREPQVYTLPPSRDELTKNQVSLTCLVKGFYPSDIAVEWESNGQPENNYKTTPVLSDSGSFFLYSKLTVDKSRWQQGNVFSCSVMHEALHNHYTQKSLSLSPGK

>FMN|PA16|G2|06

APPVAGPSVFLFPPKPKDTLMISRTPEVTCVVVDVSHEDPEVQFNWYVDGVEVHNAKTKPREEQFNSTFRVVSALTVVHQDWLNGKEYKCKVSNKGLPAPIEKTISKTKGQPREPQVYTLPPSREEMTKNQVSLTCLVKGFYPSDISVEWESNGQPENNYKTTPMLSDSGSFFLYSKLTVDKSRWQQGNVFSCSVMHEALHNHYTQKSLSLSPGK

>FMN|PA16|G2|01030405|V308

APPVAGPSVFLFPPKPKDTLMISRTPEVTCVVVDVSHEDPEVQFNWYVDGVEVHNAKTKPREEQFNSTFRVVSALTVVHQDWLNGKEYKCKVSNKGLPAPIEKTISKTKGQPREPQVYTLPPSREEMTKNQVSLTCLVKGFYPSDIAVEWESNGQPENNYKTTPMLSDSGSFFLYSKLTVDKSRWQQGNVFSCSVMHEALHNHYTQKSLSLSPGK

>FMN|PA16|G3|03

APELLGGPSVFLFPPKPKDTLMISRTPEVTCVVVDVSHEDPEVQFKWYVDGVEVHNAKTKPREEQYNSTFRVVSALTVLHQDWLNGKEYKCKVSNKALPAPIEKTISKTKGQPREPQVYTLPPSREEMTKNQVSLTCLVKGFYPSDIAVEWESSGQPENNYNTTPVLSDSGSFFLYSRLTVDKSRWQEGNVFSCSVMHEALHNRFQKSLSLSPGK

>FMN|PA016|G3|13

APELLGGPSVFLFPPKPKDTLMISRTPEVTCVVVDVSHEDPEVQFKWYVDGVEVHNAKTKPREEQYNSTFRVVSALTVLHQDWLNGKEYKCKVSNKALPAPIEKTISKTKGQPREPQVYTLPPSREEMTKNQVSLTCLVKGFYPSDIAVEWESSGQPENNYKTTPMLSDSGSFFLYSKLTVDKSRWQEGNIFSCSVMHEALHNRFQKSLSLSPGK

>FMN|PA16|G4|V308I|N325H|Q355R|T394|L410 (FMN\_PA16\_IGHG4\*06\_CH2\_I91\_CH2\_H108\_CH3\_R11) <sup>c</sup>

APEFLGGPSVFLFPPKPKDTLMISRTPEVTCVVVDVSEQEDPEVQFNWYVDGVEVHNAKTKPREEQFNSTYRVVSVLTVLHQDWLNGKEYKCKVSHKGLPSSIEKTISKAKGQPREPQVYTLPPSREEMTKNQVSLTCLVKGFYPSDIAVEWESNGQPENNYKTTPVLSDSGSFFLYSRLTVDKSRWQEGNVFSCSVMHEALHNHYTQKSLSLSLGLK

>FMN|PA16|G4|0104|E233

APEFLGGPSVFLFPPKPKDTLMISRTPEVTCVVVDVSEQEDPEVQFNWYVDGVEVHNAKTKPREEQFNSTYRVVSVLTVLHQDWLNGKEYKCKVSNKGLPSSIEKTISKAKGQPREPQVYTLPPSQEEMTKNQVSLTCLVKGFYPSDIAVEWESNGQPENNYKTTPVLSDSGSFFLYSRLTVDKSRWQEGNVFSCSVMHEALHNHYTQKSLSLSLGLK

>FMN|PA31|G1|02

APELLGGPSVFLFPPKPKDTLMISRTPEVTCVVVDVSHEDPEVKFNWYVDGVEVHNAKTKPREEQYNSTYRVVSVLTVLHQDWLNGKEYKCKVSNKALPAPIEKTISKAKGQPREPQVYTLPPSRDELTKNQVSLTCLVKGFYPSDIAVEWESNGQPENNYKTTPVLSDSGSFFLYSKLTVDKSRWQQGNVFSCSVMHEALHNHYTQKSLSLSPGK

>FMN|PA31|G2|01030405|V308

APPVAGPSVFLFPPKPKDTLMISRTPEVTCVVVDVSHEDPEVQFNWYVDGVEVHNAKTKPREEQFNSTFRVVSALTVVHQDWLNGKEYKCKVSNKGLPAPIEKTISKTKGQPREPQVYTLPPSREEMTKNQVSLTCLVKGFYPSDIAVEWESNGQPENNYKTTPMLSDSGSFFLYSKLTVDKSRWQQGNVFSCSVMHEALHNHYTQKSLSLSPGK

>FMN|PA31|G2|01030405|P271|V308|T394|T437

APPVAGPSVFLFPPKPKDTLMISRTPEVTCVVVDVSHEDPEVQFNWYVDGVEVHNAKTKPREEQFNSTFRVVSALTVVHQDWLNGKEYKCKVSNKGLPAPIEKTISKTKGQPREPQVYTLPPSREEMTKNQVSLTCLVKGFYPSDIAVEWESNGQPENNYKTTPMLSDSGSFFLYSKLTVDKSRWQQGNVFSCSVMHEALHNHYTQKSLSLSPGK

>FMN|PA31|G3|03

APELLGGPSVFLFPPKPKDTLMISRTPEVTCVVVDVSHEDPEVQFKWYVDGVEVHNAKTKPREEQYNSTFRVVSALTVLHQDWLNGKEYKCKVSNKALPAPIEKTISKTKGQPREPQVYTLPPSREEMTKNQVSLTCLVKGFYPSDIAVEWESSGQPENNYNTTPVLSDSGSFFLYSRLTVDKSRWQEGNVFSCSVMHEALHNRFQKSLSLSPGK

>FMN|PA31|G3|17

APELLGGPSVFLFPPKPKDTLMISRTPEVTCVVVDVSHEDPEVQFKWYVDGVEVHNAKTKPREEQYNSTFRVVSVLTVLHQDWLNGKEYKCKVSNKALPAPIEKTISKTKGQPREPQVYTLPPSREEM  
TKNQVSLTCLVKGFYPSDIAMEWESSGQPENNYKTTPVLDSGDSFFLYSKLTVDKSRWQQGNIFSCSV MHEALHNHYTQKSLSLSPGK

>FMN|PA31|G4|04

APEFLGGPSVFLFPPKPKDTLMISRTPEVTCVVVDVSDPEVQFNWYVDGVEVHNAKTKPREEQFNSTYRVVSVLTVLHQDWLNGKEYKCKVSNKGLPSSIEKTISKAKGQPREPQVYTLPPSQEEM  
TKNQVSLTCLVKGFYPSDIAVEWESNGQPENNYKTTPVLDSGDSFFLYSRLTVDKSRWQEGNVFSCSV MHEALHNHYTQKSLSLSPGK

>FMN|PA31|G4|0104|E233

APEFLGGPSVFLFPPKPKDTLMISRTPEVTCVVVDVSDPEVQFNWYVDGVEVHNAKTKPREEQFNSTYRVVSVLTVLHQDWLNGKEYKCKVSNKGLPSSIEKTISKAKGQPREPQVYTLPPSQEEM  
TKNQVSLTCLVKGFYPSDIAVEWESNGQPENNYKTTPVLDSGDSFFLYSRLTVDKSRWQEGNVFSCSV MHEALHNHYTQKSLSLSPGK

>FMN|PA42|G1|02

APELLGGPSVFLFPPKPKDTLMISRTPEVTCVVVDVSHEDPEVKFNWYVDGVEVHNAKTKPREEQYNSTYRVVSVLTVLHQDWLNGKEYKCKVSNKALPAPIEKTISKAKGQPREPQVYTLPPSRDEL  
TKNQVSLTCLVKGFYPSDIAVEWESNGQPENNYKTTPVLDSGDSFFLYSKLTVDKSRWQQGNV FSCSV MHEALHNHYTQKSLSLSPGK

>FMN|PA42|G2|06

APPVAGPSVFLFPPKPKDTLMISRTPEVTCVVVDVSHEDPEVQFNWYVDGVEVHNAKTKPREEQFNSTFRVVSVLTVVHQDWLNGKEYKCKVSNKGLPAPIEKTISKTKGQPREPQVYTLPPSREEM  
TKNQVSLTCLVKGFYPSDISVEWESNGQPENNYKTTPMLDSGDSFFLYSKLTVDKSRWQQGNV FSCSV MHEALHNHYTQKSLSLSPGK

>FMN|PA42|G3|01040510

APELLGGPSVFLFPPKPKDTLMISRTPEVTCVVVDVSHEDPEVQFKWYVDGVEVHNAKTKPREEQYNSTFRVVSVLTVLHQDWLNGKEYKCKVSNKALPAPIEKTISKTKGQPREPQVYTLPPSREEM  
TKNQVSLTCLVKGFYPSDIAVEWESSGQPENNYNTTPMLDSGDSFFLYSKLTVDKSRWQQGNIFSCSV MHEALHNHYTQKSLSLSPGK

>FMN|PA42|G4|01

APEFLGGPSVFLFPPKPKDTLMISRTPEVTCVVVDVSDPEVQFNWYVDGVEVHNAKTKPREEQFNSTYRVVSVLTVLHQDWLNGKEYKCKVSNKGLPSSIEKTISKAKGQPREPQVYTLPPSQEEM  
TKNQVSLTCLVKGFYPSDIAVEWESNGQPENNYKTTPVLDSGDSFFLYSRLTVDKSRWQEGNV FSCSV MHEALHNHYTQKSLSLSPGK

>FMN|PA42|G4|04

APEFLGGPSVFLFPPKPKDTLMISRTPEVTCVVVDVSDPEVQFNWYVDGVEVHNAKTKPREEQFNSTYRVVSVLTVLHQDWLNGKEYKCKVSNKGLPSSIEKTISKAKGQPREPQVYTLPPSQEEM  
TKNQVSLTCLVKGFYPSDIAVEWESNGQPENNYKTTPVLDSGDSFFLYSRLTVDKSRWQEGNV FSCSV MHEALHNHYTQKSLSLSPGK

>FMN|PA45|G1|02

APELLGGPSVFLFPPKPKDTLMISRTPEVTCVVVDVSHEDPEVKFNWYVDGVEVHNAKTKPREEQYNSTYRVVSVLTVLHQDWLNGKEYKCKVSNKALPAPIEKTISKAKGQPREPQVYTLPPSRDEL  
TKNQVSLTCLVKGFYPSDIAVEWESNGQPENNYKTTPVLDSGDSFFLYSKLTVDKSRWQQGNV FSCSV MHEALHNHYTQKSLSLSPGK

>FMN|PA45|G2|01030405|V308|T394

APPVAGPSVFLFPPKPKDTLMISRTPEVTCVVVDVSHEDPEVQFNWYVDGVEVHNAKTKPREEQFNSTFRVVSVLTVVHQDWLNGKEYKCKVSNKGLPAPIEKTISKTKGQPREPQVYTLPPSREEM  
TKNQVSLTCLVKGFYPSDIAVEWESNGQPENNYKTTPMLDSGDSFFLYSKLTVDKSRWQQGNV FSCSV MHEALHNHYTQKSLSLSPGK

>FMN|PA45|G2|01030405|V308|T394|T437

APPVAGPSVFLFPPKPKDTLMISRTPEVTCVVVDVSHEDPEVQFNWYVDGVEVHNAKTKPREEQFNSTFRVVSVLTVVHQDWLNGKEYKCKVSNKGLPAPIEKTISKTKGQPREPQVYTLPPSREEM  
TKNQVSLTCLVKGFYPSDIAVEWESNGQPENNYKTTPMLDSGDSFFLYSKLTVDKSRWQQGNV FSCSV MHEALHNHYTQKSLSLSPGK

>FMN|PA45|G3|01040510

APELLGGPSVFLFPPKPKDTLMISRTPEVTCVVVDVSHEDPEVQFKWYVDGVEVHNAKTKPREEQYNSTFRVVSVLTVLHQDWLNGKEYKCKVSNKALPAPIEKTISKTKGQPREPQVYTLPPSREEM  
TKNQVSLTCLVKGFYPSDIAVEWESSGQPENNYNTTPPMLDSDGSFFLYSKLTVDKSRWQQGNVFCFSVMHEALHNRFQKLSLSLSPGK

**>FMN|PA45|G4|01**

APEFLGGPSVFLFPPKPKDTLMISRTPEVTCVVVDVSDQEDPEVQFNWYVDGVEVHNAKTKPREEQFNSTYRVVSVLTVLHQDWLNGKEYKCKVSNKGLPSSIEKTISKAKGQPREPQVYTLPPSQEEM  
TKNQVSLTCLVKGFYPSDIAVEWESNGQPENNYKTPPVLDSDGSFFLYSRLTVDKSRWQEGNVFSCFSVMHEALHNHYTQKLSLSLSPGK

**>FMN|PA48|G1|02**

APELLGGPSVFLFPPKPKDTLMISRTPEVTCVVVDVSHEDPEVKFNWYVDGVEVHNAKTKPREEQYNSTYRVVSVLTVLHQDWLNGKEYKCKVSNKALPAPIEKTISKAKGQPREPQVYTLPPSRDEL  
KNQVSLTCLVKGFYPSDIAVEWESNGQPENNYKTPPVLDSDGSFFLYSKLTVDKSRWQQGNVFCFSVMHEALHNHYTQKLSLSLSPGK

**>FMN|PA48|G2|01030405|V308**

APPVAGPSVFLFPPKPKDTLMISRTPEVTCVVVDVSHEDPEVQFNWYVDGVEVHNAKTKPREEQFNSTFRVVSVLTVVHQDWLNGKEYKCKVSNKGLPAPIEKTISKTKGQPREPQVYTLPPSREEM  
TKNQVSLTCLVKGFYPSDIAVEWESNGQPENNYKTPPMLDSDGSFFLYSKLTVDKSRWQQGNVFCFSVMHEALHNHYTQKLSLSLSPGK

**>FMN|PA48|G3|03**

APELLGGPSVFLFPPKPKDTLMISRTPEVTCVVVDVSHEDPEVQFKWYVDGVEVHNAKTKPREEQYNSTFRVVSVLTVLHQDWLNGKEYKCKVSNKALPAPIEKTISKTKGQPREPQVYTLPPSREEM  
TKNQVSLTCLVKGFYPSDIAVEWESSGQPENNYNTTPPVLDSDGSFFLYSRLTVDKSRWQEGNVFSCFSVMHEALHNRFQKLSLSLSPGK

**>FMN|PA48|G4|0104|E233**

APEFLGGPSVFLFPPKPKDTLMISRTPEVTCVVVDVSDQEDPEVQFNWYVDGVEVHNAKTKPREEQFNSTYRVVSVLTVLHQDWLNGKEYKCKVSNKGLPSSIEKTISKAKGQPREPQVYTLPPSQEEM  
TKNQVSLTCLVKGFYPSDIAVEWESNGQPENNYKTPPVLDSDGSFFLYSRLTVDKSRWQEGNVFSCFSVMHEALHNHYTQKLSLSLSPGK

<sup>a</sup>: “>”: FASTA format; “FMN”: origin; “|AS50|”: sample ID; “|G1|”: IG heavy chain type 1; “|02””: IG heavy chain type-related AA allele already referenced in IMGT<sup>®</sup>. For each sample and each IG heavy chain, one to two AA alleles are mentioned according to the homozygous or heterozygous allele carriage, respectively.

<sup>b</sup>: For an AA sequence which is not yet referenced in IMGT<sup>®</sup>, each SAAV (with or without substitution) is mentioned between vertical bars, according to IMGT<sup>®</sup> (<http://www.imgt.org>) amino acid EU numbering (23).

<sup>c</sup>: Novel IGHG2 and IGHG4 IMGT AA alleles identified in this study and approved by the IMGT Nomenclature committee (IMGT-NC).

<sup>d</sup>: Combination of IGHG3\*01, IGHG3\*04, IGHG3\*05 and IGHG3\*10 alleles sharing the same AA sequence.

<sup>e</sup>: AA sequence already referenced in IMGT<sup>®</sup> under IGHG4\*01 or IGHG4\*04 allele but whose nucleotide sequence carries synonymous variations at the codon corresponding to amino acid E233.

**Supplemental Table S2:** Nucleotide positions of the IGHG gene components from the hinge exon (and for IGHG3 from the most 3' hinge exon) to the CH3-CHS exons

| Nt numbering                                            | Hinge exon                | Intron    | CH2 exon  | Intron    | CH3-CHS exon               |
|---------------------------------------------------------|---------------------------|-----------|-----------|-----------|----------------------------|
| <b>IMGT/LIGM-DB numbering <sup>a</sup>:</b>             |                           |           |           |           |                            |
| <b>IGHG1*01</b> (J00228)                                | 892-936                   | 937-1054  | 1055-1384 | 1385-1480 | 1481-1800                  |
| <b>IGHG2*01</b> (J00230)                                | 902-937                   | 938-1055  | 1056-1382 | 1383-1479 | 1480-1799                  |
| <b>IGHG3*01</b> (X03604)                                | 1471-1515                 | 1516-1633 | 1634-1963 | 1964-2060 | 2061-2380                  |
| <b>IGHG4*01</b> (K01316)                                | 900-935                   | 936-1053  | 1054-1383 | 1384-1480 | 1481-1800                  |
| <b>IMGT unique numbering for C-DOMAIN <sup>b</sup>:</b> |                           |           |           |           |                            |
| <b>all IGHG</b>                                         | 1-45 or 1-36 <sup>c</sup> |           | 1.6-375   |           | 1.4-375 (1-6) <sup>d</sup> |

The five IGHG gene components are represented in the 5'→3' direction, starting with the hinge exon (most 3' hinge exon (H4) for IGHG3\*01) and ending with the CH3-CHS exon. Allele\*01 of each IGHG is given with its accession number in IMGT/LIGM-DB reference sequence (24).

<sup>a</sup>: The numbering position is according to IMGT/LIGM-DB (<http://www.imgt.org>) accession number.

<sup>b</sup>: The numbering position is according to IMGT Scientific chart (2, 25).

<sup>c</sup>: 1-45 for IGHG1\*01 and for IGHG3\*01 H4 hinge exon; 1-36 for IGHG2\*01 and IGHG4\*01.

<sup>d</sup>: The numbering in brackets corresponds to CHS.



**Supplemental Table S3:** Validation of IGHG1, IGHG2, IGHG3 and IGHG4 gene amplification according to IGHG gene specific codons

| IMGT Nt numbering <sup>c</sup> | AA numbering      |                 | Contigs <sup>a</sup> |                      |            |            |            | Samples <sup>b</sup> |            |            |                        |                    |
|--------------------------------|-------------------|-----------------|----------------------|----------------------|------------|------------|------------|----------------------|------------|------------|------------------------|--------------------|
|                                | IMGT <sup>c</sup> | EU <sup>d</sup> | IGHG1                | IGHG2                | IGHG3      | IGHG4      | IGHGP      | IGHG1                | IGHG2      | IGHG3      | IGHG4                  | IGHGP <sup>e</sup> |
| <b>CH2 exon</b>                |                   |                 | 5 (5)                | 6 (8)                | 19 (57)    | 4 (4)      |            |                      |            |            |                        |                    |
| 1.6-3.6                        | 1.6               | 231             | gca                  | gca                  | gca        | gca        | <b>aca</b> |                      |            |            |                        | <b>no aca</b>      |
| 1.5-3.5                        | 1.5               | 232             | cct                  | <b>cca</b>           | cct        | cct        | <b>act</b> |                      | <b>cca</b> |            |                        | <b>no act</b>      |
| 1.4-3.4                        | 1.4               | 233             | gaa                  | ---                  | gaa        | <b>gag</b> | gaa        |                      | ---        |            | <b>gag<sup>f</sup></b> |                    |
| 1.3-3.3                        | 1.3               | 234             | ctc                  | <b>cct</b>           | ctc        | <b>ttc</b> | <b>ccc</b> |                      | <b>cct</b> |            | <b>ttc</b>             | <b>no ccc</b>      |
| 1.2-3.2                        | 1.2               | 235             | ctg                  | <b>gtg</b>           | ctg        | ctg        | ctg        |                      | <b>gtg</b> |            |                        |                    |
| 1.1-3.1                        | 1.1               | 236             | ggg                  | <b>gca</b>           | <b>gga</b> | ggg        | ggg        |                      | <b>gca</b> | <b>gga</b> |                        |                    |
| 4-6                            | 2                 | 238             | ccg                  | ccg                  | ccg        | <b>cca</b> | ccg        |                      |            |            | <b>cca</b>             |                    |
| 16-18                          | 6                 | 242             | ctc                  | ctc                  | ctc        | <b>ctg</b> | ctc        |                      |            |            | <b>ctg</b>             |                    |
| 40-42                          | 14                | 250             | acc                  | acc                  | acc        | <b>act</b> | acc        |                      |            |            | <b>act<sup>f</sup></b> |                    |
| 43-45                          | 15                | 251             | ctc                  | ctc                  | <b>ctt</b> | ctc        | ctc        |                      |            | <b>ctt</b> |                        |                    |
| 43.2-45.2                      | 15.2              | 253             | atc                  | atc                  | <b>att</b> | atc        | atc        |                      |            | <b>att</b> |                        |                    |
| 64-66                          | 22                | 260             | <b>aca</b>           | acg                  | acg        | acg        | acg        | <b>aca</b>           |            |            |                        |                    |
| 88-90                          | 30                | 268             | cac                  | cac                  | cac        | <b>cag</b> | cac        |                      |            |            | <b>cag</b>             |                    |
| 118-120                        | 40                | 276             | aac                  | aac                  | <b>aag</b> | aac        | aac        |                      |            | <b>aag</b> |                        |                    |
| 130-132                        | 44                | 280             | gac                  | gac                  | gac        | <b>gat</b> | gac        |                      |            |            | <b>gat</b>             |                    |
| 244-246                        | 82                | 291             | ccg                  | <b>cca</b>           | ccg        | ccg        | ccg        |                      | <b>cca</b> |            |                        |                    |
| 253.1-255.1                    | 85.1              | 301             | cgt/cgg <sup>g</sup> | cgt                  | cgt        | cgt        | <b>cat</b> |                      |            |            |                        | <b>no cat</b>      |
| 283-285                        | 95                | 312             | gac                  | gac                  | gac        | gac        | <b>aac</b> |                      |            |            |                        | <b>no aac</b>      |
| 292-294                        | 98                | 315             | <b>aat</b>           | aac                  | aac        | aac        | aac        | <b>aat</b>           |            |            |                        |                    |
| 340-342                        | 114               | 329             | cca                  | cca                  | cca        | <b>ccg</b> | cca        |                      |            |            | <b>ccg</b>             |                    |
| 343-345                        | 115               | 330             | gcc                  | gcc                  | gcc        | <b>tcc</b> | gcc        |                      |            |            | <b>tcc</b>             |                    |
| 346-348                        | 116               | 331             | ccc                  | ccc                  | ccc        | <b>tcc</b> | ccc        |                      |            |            | <b>tcc</b>             |                    |
| <b>CH3-CHS exons</b>           |                   |                 |                      |                      |            |            |            |                      |            |            |                        |                    |
| 1-3                            | 1                 | 345             | gaa                  | gaa                  | gaa        | <b>gag</b> | gaa        |                      |            |            | <b>gag</b>             |                    |
| 34-36                          | 12                | 356             | gat/gag <sup>h</sup> | gag                  | gag        | gag        | <b>aag</b> |                      |            |            |                        | <b>no aag</b>      |
| 37-39                          | 13                | 357             | gag                  | gag                  | gag        | gag        | ---        |                      |            |            |                        | <b>no deletion</b> |
| 58-60                          | 20                | 364             | agc                  | agc                  | agc        | agc        | <b>acc</b> |                      |            |            |                        | <b>no acc</b>      |
| 85-87                          | 29                | 373             | <b>tat</b>           | tac                  | tac        | tac        | tac        | <b>tat</b>           |            |            |                        |                    |
| 112-114                        | 38                | 378             | gcc                  | gcc/tcc <sup>i</sup> | gcc        | gcc        | <b>acc</b> |                      |            |            |                        | <b>no acc</b>      |

|             |      |     |     |     |     |            |            |            |               |
|-------------|------|-----|-----|-----|-----|------------|------------|------------|---------------|
| 250.4-252.4 | 84.4 | 401 | gac | gac | gac | gac        | <b>aac</b> |            | <b>no aac</b> |
| 328-330     | 110  | 431 | gct | gct | gct | gct        | <b>ggt</b> |            | <b>no ggt</b> |
| 373-375     | 125  | 445 | ccg | ccg | ccg | <b>ctg</b> | ccg        | <b>ctg</b> |               |

Number of alleles for each IGHG gene (and between parentheses number of sequences) is shown below the four IGHG functional genes (IMGT Alignments of alleles, IMGT Repertoire, <http://www.imgt.org>) (3); specific codons in bold.

<sup>a</sup> : sequence compilations of 5 IGHG1, 6 IGHG2, 19 IGHG3, 4 IGHG4 and 2 IGHGP alleles according to IMGT<sup>®</sup> <http://www.imgt.org>.

<sup>b</sup> : contigs results for the 10 samples under study (AS50, NP49, PA01, PA07, PA09, PA16, PA31, PA42, PA45 and PA48).

<sup>c</sup> : Nucleotide (Nt) and amino acid (AA) numbering according to IMGT<sup>®</sup> <http://www.imgt.org>, IMGT unique numbering for C-DOMAIN (2, 25).

<sup>d</sup> : amino acid EU numbering according to IMGT<sup>®</sup> <http://www.imgt.org> (23).

<sup>e</sup> : verification of the absence of IGHGP amplification

<sup>f</sup> : this specific codon was not validated in several cases (CH2 g3.4>a and CH2 t42>c), see Table 5 for more precisions.

<sup>g</sup> : cgt for all IGHG1 except for IGHG1\*01 (cgg).

<sup>h</sup> : gat for all IGHG1 except for IGHG1\*03 (gag).

<sup>i</sup> : gcc for all IGHG2 except for IGHG2\*06 (tcc).

**Supplemental Table S4:** Decision tree reading for IGHG nucleotide sequences with the representation of the CH2 and CH3-CHS polymorphisms

| IMGT     | CH2 domain |     |     |     |      |     |     |      |      |     |     |     | CH3 domain |     |     |     |     |     |     |     |     |     |     |     | IGHG alleles |     |     |     |     |     |     |     |                |                   |
|----------|------------|-----|-----|-----|------|-----|-----|------|------|-----|-----|-----|------------|-----|-----|-----|-----|-----|-----|-----|-----|-----|-----|-----|--------------|-----|-----|-----|-----|-----|-----|-----|----------------|-------------------|
|          | 1.5        | 1.4 | 1.1 | 9   | 45.1 | 82  | 83  | 84.3 | 85.1 | 91  | 92  | 124 | 1.4        | 12  | 14  | 38  | 39  | 44  | 79  | 81  | 84  | 86  | 88  | 89  |              | 90  | 98  | 100 | 101 | 115 | 116 | 117 | 124            |                   |
| EU index | 232        | 233 | 236 | 245 | 282  | 291 | 292 | 296  | 301  | 308 | 309 | 339 | 341        | 356 | 358 | 378 | 379 | 384 | 392 | 394 | 397 | 407 | 409 | 410 | 411          | 419 | 421 | 422 | 435 | 436 | 437 | 444 |                |                   |
|          | P          | -   | A   | P   | M    | P   | R   | F    | R    | V   | V   | T   | G          | E   | M   | A   | V   | N   | K   | T   | M   | Y   | K   | L   | T            | Q   | N   | V   | H   | Y   | T   | S   | IGHG2*02       |                   |
|          | cca        | --- | gca | cca | atg  | cca | cgg | ttc  | cgt  | gtc | gtg | acc | ggg        | gag | atg | gcc | gtg | aat | aag | aca | atg | tac | aag | ctc | acc          | cag | aac | gtc | cac | tac | aca | tct | IGHG2*06       |                   |
|          |            |     |     | └   |      |     |     |      |      |     |     |     | ggg        | gag | atg | tcc | gtg | aat | aag | aca | atg | tac | aag | ctc | acc          | cag | aac | gtc | cac | tac | aca | tct | IGHG2*01*03*04 |                   |
|          |            |     |     |     |      |     |     |      | └    |     |     |     | ggg        | gag | atg | gcc | gtg | aat | aag | aca | atg | tac | aag | ctc | acc          | cag | aac | gtc | cac | tac | aca | tct | IGHG2*05       |                   |
|          |            |     |     |     |      |     |     |      |      | └   |     |     |            |     |     |     |     |     |     | └   | acg | atg | tac | aag | ctc          | acc | cag | aac | gtc | cac | tac | aca | tct            | IGHG1*01          |
|          |            |     |     |     |      |     |     |      |      |     |     |     | ggg        | gat | ctg | gcc | gtg | aat | aag | acg | gtg | tac | aag | ctc | acc          | cag | aac | gtc | cac | tac | aca | tct | IGHG1*03       |                   |
|          |            |     |     |     |      |     |     |      |      |     |     |     | ggg        | gat | atg | gcc | gtg | aat | aag | acg | gtg | tac | aag | ctc | acc          | cag | aac | gtc | cac | tac | aca | tct | IGHG1*04       |                   |
|          |            |     |     |     |      |     |     |      |      |     |     |     | └          | gat | ctg | gcc | gtg | aat | aag | acg | gtg | tac | aag | ctc | acc          | cag | aac | gtc | cac | tac | aca | tct | IGHG1*02       |                   |
|          |            |     |     |     |      |     |     |      |      |     |     |     |            |     |     |     |     |     |     |     |     |     |     |     |              |     | └   | V   | H   | Y   | T   | S   | IGHG1*05       |                   |
|          |            |     |     |     |      |     |     |      |      |     |     |     |            |     |     |     |     |     |     |     |     |     |     |     |              |     | └   | gtc | cac | tac | aca | tct | IGHG3*02       |                   |
|          |            |     |     |     |      |     |     |      |      |     |     |     |            |     |     |     |     |     |     |     |     |     |     |     |              |     |     |     |     |     |     |     |                | IGHG3*16          |
|          |            |     |     |     |      |     |     |      |      |     |     |     |            |     |     |     |     |     |     |     |     |     |     |     |              |     |     |     |     |     |     |     |                | IGHG3*15          |
|          |            |     |     |     |      |     |     |      |      |     |     |     |            |     |     |     |     |     |     |     |     |     |     |     |              |     |     |     |     |     |     |     |                | IGHG3*14          |
|          |            |     |     |     |      |     |     |      |      |     |     |     |            |     |     |     |     |     |     |     |     |     |     |     |              |     |     |     |     |     |     |     |                | IGHG3*18*19       |
|          |            |     |     |     |      |     |     |      |      |     |     |     |            |     |     |     |     |     |     |     |     |     |     |     |              |     |     |     |     |     |     |     |                | IGHG3*11*12       |
|          |            |     |     |     |      |     |     |      |      |     |     |     |            |     |     |     |     |     |     |     |     |     |     |     |              |     |     |     |     |     |     |     |                | IGHG3*09          |
|          |            |     |     |     |      |     |     |      |      |     |     |     |            |     |     |     |     |     |     |     |     |     |     |     |              |     |     |     |     |     |     |     |                | IGHG3*06*07       |
|          |            |     |     |     |      |     |     |      |      |     |     |     |            |     |     |     |     |     |     |     |     |     |     |     |              |     |     |     |     |     |     |     |                | IGHG3*17          |
|          |            |     |     |     |      |     |     |      |      |     |     |     |            |     |     |     |     |     |     |     |     |     |     |     |              |     |     |     |     |     |     |     |                | IGHG3*08          |
|          |            |     |     |     |      |     |     |      |      |     |     |     |            |     |     |     |     |     |     |     |     |     |     |     |              |     |     |     |     |     |     |     |                | IGHG3*13          |
|          |            |     |     |     |      |     |     |      |      |     |     |     |            |     |     |     |     |     |     |     |     |     |     |     |              |     |     |     |     |     |     |     |                | IGHG3*03          |
|          |            |     |     |     |      |     |     |      |      |     |     |     |            |     |     |     |     |     |     |     |     |     |     |     |              |     |     |     |     |     |     |     |                | IGHG3*01*04*05*10 |
|          |            |     |     |     |      |     |     |      |      |     |     |     |            |     |     |     |     |     |     |     |     |     |     |     |              |     |     |     |     |     |     |     |                | IGHG4*02          |
|          |            |     |     |     |      |     |     |      |      |     |     |     |            |     |     |     |     |     |     |     |     |     |     |     |              |     |     |     |     |     |     |     |                | IGHG4*03          |
|          |            |     |     |     |      |     |     |      |      |     |     |     |            |     |     |     |     |     |     |     |     |     |     |     |              |     |     |     |     |     |     |     |                | IGHG4*01          |
|          |            |     |     |     |      |     |     |      |      |     |     |     |            |     |     |     |     |     |     |     |     |     |     |     |              |     |     |     |     |     |     |     |                | IGHG4*04          |

**Supplemental Table S5:** Discriminatory nucleotide and/or AA positions along the alignment of *Homo sapiens* IGHG2 alleles, including the 5 (exon) IGHG2 novel alleles

| GenBank Accession N°  | IMGT allele name      |   | IMGT UN <sup>a</sup> | CH1 exon |          |                 |          |          | CH2 exon |                 |          | CH3-CHS exon    |                 |          |          |
|-----------------------|-----------------------|---|----------------------|----------|----------|-----------------|----------|----------|----------|-----------------|----------|-----------------|-----------------|----------|----------|
|                       |                       |   |                      | 19       | 82       | 92              | 95       | 96       | 35       | 45.1            | 91       | 92              | 38              | 81       | 117      |
| J00230                | IGHG2*01              | F | AA<br>gDNA           | A<br>gcc | P<br>cca | P<br>ccc        | N<br>aac | F<br>ttc | P<br>ccc | V<br>gtg        | V<br>ggt | V<br>gtg        | A<br>gcc        | T<br>aca | T<br>acg |
| Z49802                | IGHG2*01              | F | AA<br>gDNA           |          |          |                 | No data  |          | ---      | ---             | ---      | ---             | ---             | ---      | ---      |
| AJ250170              | IGHG2*02              | F | AA<br>gDNA           | --g      | --g      | <b>T</b><br>a-- | ---      | ---      | ---      | <b>M</b><br>a-- | --c      | ---             | ---             | ---      | --a      |
| Z49801                | IGHG2*02              | F | AA<br>gDNA           |          |          |                 | No data  |          | ---      | <b>M</b><br>a-- | --c      | ---             | ---             | ---      | --a      |
| AF449616              | IGHG2*03              | F | AA<br>gDNA           | --g      | ---      | ---             | ---      | ---      | ---      | ---             | ---      | ---             | ---             | ---      | ---      |
| AF449617              | IGHG2*04              | F | AA<br>gDNA           | --g      | ---      | ---             | --g      | --g      | ---      | ---             | ---      | ---             | ---             | ---      | ---      |
| AF449618              | IGHG2*05              | F | AA<br>gDNA           | --g      | ---      | ---             | ---      | ---      | ---      | ---             | ---      | ---             | ---             | --g      | ---      |
| AL928742              | IGHG2*06              | F | AA<br>gDNA           | --g      | --g      | ---             | ---      | ---      | ---      | ---             | --c      | ---             | <b>S</b><br>t-- | ---      | --a      |
| KX670549              | IGHG2*07 <sup>b</sup> |   | AA<br>gDNA           |          |          |                 | No data  |          | ---      | ---             | --c      | <b>L</b><br>c-- | ---             | --g      | ---      |
| KX670550 <sup>c</sup> | IGHG2*08 <sup>b</sup> |   | AA<br>gDNA           |          |          |                 | No data  |          | ---      | ---             | --c      | ---             | ---             | ---      | ---      |
| KX670551 <sup>c</sup> | IGHG2*08 <sup>b</sup> |   | AA<br>gDNA           |          |          |                 | No data  |          | ---      | ---             | --c      | ---             | ---             | ---      | ---      |
| KX670552              | IGHG2*09 <sup>b</sup> |   | AA<br>gDNA           |          |          |                 | No data  |          | ---      | ---             | --c      | ---             | ---             | --g      | ---      |
| KX670553              | IGHG2*10 <sup>b</sup> |   | AA<br>gDNA           |          |          |                 | No data  |          | --t      | ---             | --c      | ---             | ---             | --g      | --a      |
| KX670554              | IGHG2*11 <sup>b</sup> |   | AA<br>gDNA           |          |          |                 | No data  |          | ---      | ---             | --c      | ---             | ---             | --g      | --a      |

<sup>a</sup>: IMGT Unique Numbering, according to IMGT® scientific chart (<http://www.imgt.org>).

<sup>b</sup>: the denomination of IGHG2\*07\*08\*09\*10\*11 alleles is followed by “i” to signify that this denomination is in process and not yet formalized in IMGT® repertoire.

<sup>c</sup>: KX670550 and KX670551 sequences are different in the intron between the CH2 and CH3-CHS exons.

F: functional. AA: amino acid. gDNA: genomic DNA.

No letter at AA position indicates identical amino acid in comparison with IGHG2\*01. Dashes at gDNA position indicate identical nucleotides in comparison with allele IGHG2\*01. Nucleotide and amino acid changes (for a given codon) are indicated in bold letter.

**Supplemental Table S6:** Discriminatory nucleotide and/or AA positions along the alignment of *Homo sapiens* IGHG4 alleles, including the 4 IGHG4 alleles newly identified

| GenBank Accession N° | IMGT allele name       | IMGT UN <sup>a</sup> | CH1 exon |            | CH2 exon   |            |            |            |            | CH3-CHS exon |            |            |            |            |            |
|----------------------|------------------------|----------------------|----------|------------|------------|------------|------------|------------|------------|--------------|------------|------------|------------|------------|------------|
|                      |                        |                      | 3        | 1.4        | 14         | 91         | 92         | 108        | 11         | 81           | 88         | 89         | 100        | 117        |            |
| K01316               | IGHG4*01               | F                    | AA       | S          | E          | T          | V          | L          | N          | Q            | T          | R          | L          | N          | T          |
|                      |                        |                      | gDNA     | tcc        | gag        | act        | gtc        | ctg        | aac        | cag          | acg        | agg        | cta        | aat        | aca        |
| AJ001563             | IGHG4*02               | F                    | AA       | No data    |            |            |            | <b>V</b>   |            |              |            |            |            |            |            |
|                      |                        |                      | gDNA     |            | ---        | ---        | ---        | <b>g--</b> | ---        | ---          | ---        | ---        | ---        | ---        | <b>--g</b> |
| AJ001564             | IGHG4*03               | F                    | AA       | No data    |            |            |            |            |            |              |            | K          |            |            |            |
|                      |                        |                      | gDNA     |            | ---        | ---        | ---        | ---        | ---        | ---          | ---        | <b>-a-</b> | <b>--c</b> | <b>--c</b> | <b>--g</b> |
| AL928742             | IGHG4*04               | F                    | AA       |            |            |            |            |            |            |              |            |            |            |            |            |
|                      |                        |                      | gDNA     | <b>--g</b> | ---        | ---        | ---        | ---        | ---        | ---          | ---        | ---        | <b>--c</b> | ---        | ---        |
| KX670555             | IGHG4*05i <sup>b</sup> |                      | AA       | No data    |            |            | <b>I</b>   |            | <b>H</b>   | <b>R</b>     |            |            |            |            |            |
|                      |                        |                      | gDNA     |            | ---        | ---        | <b>a--</b> | ---        | <b>c--</b> | <b>-g-</b>   | <b>--a</b> | ---        | <b>--c</b> | ---        | ---        |
| KX670556             | IGHG4*06i <sup>b</sup> |                      | AA       | No data    |            |            | <b>I</b>   |            | <b>H</b>   |              |            |            |            |            |            |
|                      |                        |                      | gDNA     |            | ---        | ---        | <b>a--</b> | ---        | <b>c--</b> | ---          | ---        | ---        | <b>--c</b> | ---        | ---        |
| KX670557             | IGHG4*07i <sup>b</sup> |                      | AA       | No data    |            |            |            |            |            |              |            |            |            |            |            |
|                      |                        |                      | gDNA     |            | <b>--a</b> | ---        | ---        | ---        | ---        | ---          | ---        | ---        | ---        | ---        | ---        |
| KX670558             | IGHG4*08i <sup>b</sup> |                      | AA       | No data    |            |            |            |            |            |              |            |            |            |            |            |
|                      |                        |                      | gDNA     |            | <b>--a</b> | <b>--c</b> | ---        | ---        | ---        | ---          | ---        | ---        | ---        | ---        | ---        |

<sup>a</sup>: IMGT Unique Numbering, according to IMGT® scientific chart (<http://www.imgt.org>).

<sup>b</sup>: the denomination of IGHG4\*05\*06\*07\*08 alleles is followed by “i” to signify that this denomination is in process and not yet formalized in IMGT® repertoire.

F: functional. AA: amino acid. gDNA: genomic DNA.

No letter at AA position indicates identical amino acid in comparison with IGHG4\*01. Dashes at gDNA position indicate identical nucleotides in comparison with allele IGHG4\*01. Nucleotide and amino acid changes (for a given codon) are indicated in bold letter.



### Supplemental Figure 2: MS/MS fragmentation of a putatively new IGHC4 peptide identified in two distinct samples of purified IgG

MS/MS Fragmentation of **VVSVLTILHQDWLNKG**

Found in **FMN|AS50|G4|V308I|N325H|Q355R|T394|L410** in **FIMIAS50**, FMN|AS50|G4|V308I|N325H|Q355R|T394|L410

Match to Query 9406: 1821.011208 from(911.512880,2+) intensity(18404198.0000) rtinseconds(2090) scans(16738) index(13848)

Title: File14016 Spectrum14014 scans: 16738

Data file \|0.114.108.227|qexdata\Data\2014\Pharma\FIMI140719\_Q695aQ704\FIMI140719\_AS50\_Q695.mgf

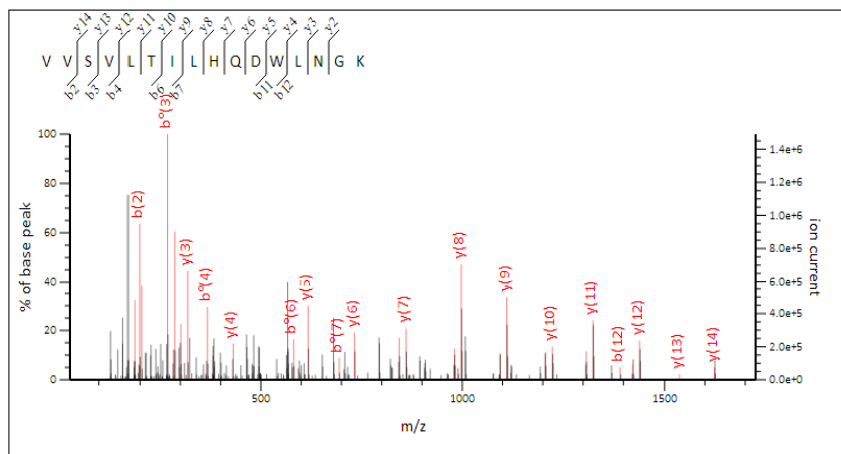

Monoisotopic mass of neutral peptide Mr(calc): 1821.0149

Ions Score: 78 Expect: 1.6e-05

Matches : 25/148 fragment ions using 59 most intense peaks ([help](#))

MS/MS Fragmentation of **VVSVLTILHQDWLNKG**

Found in **FMN|PA16|G4|V308I|N325H|Q355R|T394|L410** in **FIMIPA16**, FMN|PA16|G4|V308I|N325H|Q355R|T394|L410

Match to Query 9760: 1821.011142 from(608.010990,3+) intensity(2270489.5000) rtinseconds(2091) scans(16469) index(13608)

Title: File14026 Spectrum13745 scans: 16469

Data file \|0.114.108.227|qexdata\Data\2014\Pharma\FIMI140719\_Q695aQ704\FIMI140719\_PA16\_Q699.mgf

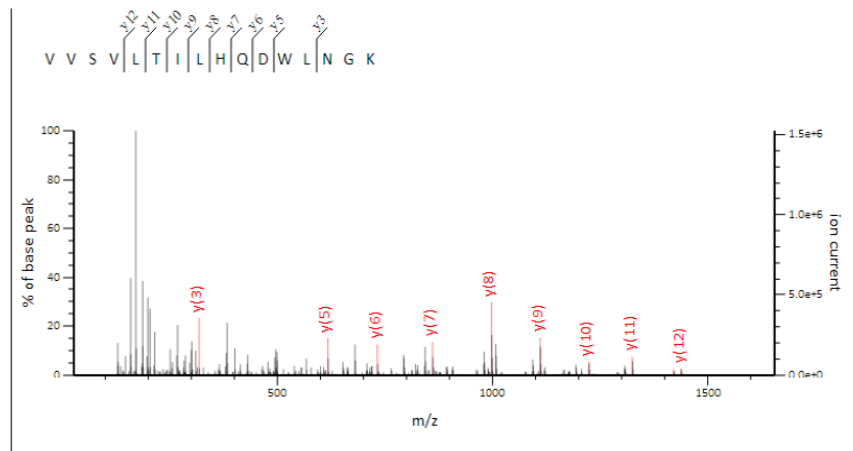

Monoisotopic mass of neutral peptide Mr(calc): 1821.0149

Ions Score: 64 Expect: 4.2e-07

Matches : 10/148 fragment ions using 15 most intense peaks ([help](#))

| #  | b         | b <sup>++</sup> | b <sup>*</sup> | b <sup>+++</sup> | b <sup>0</sup> | b <sup>0++</sup> | Seq. | y         | y <sup>++</sup> | y <sup>*</sup> | y <sup>+++</sup> | y <sup>0</sup> | y <sup>0++</sup> | #  |
|----|-----------|-----------------|----------------|------------------|----------------|------------------|------|-----------|-----------------|----------------|------------------|----------------|------------------|----|
| 1  | 100.0757  | 50.5415         |                |                  |                |                  | V    |           |                 |                |                  |                |                  | 16 |
| 2  | 199.1441  | 100.0757        |                |                  |                |                  | V    | 1722.9537 | 861.9805        | 1705.9272      | 853.4672         | 1704.9432      | 852.9752         | 15 |
| 3  | 286.1761  | 143.5917        |                |                  | 268.1656       | 134.5864         | S    | 1623.8853 | 812.4463        | 1606.8588      | 803.9330         | 1605.8748      | 803.4410         | 14 |
| 4  | 385.2445  | 193.1259        |                |                  | 367.2340       | 184.1206         | V    | 1536.8533 | 768.9303        | 1519.8267      | 760.4170         | 1518.8427      | 759.9250         | 13 |
| 5  | 498.3286  | 249.6679        |                |                  | 480.3180       | 240.6627         | L    | 1437.7849 | 719.3961        | 1420.7583      | 710.8828         | 1419.7743      | 710.3908         | 12 |
| 6  | 599.3763  | 300.1918        |                |                  | 581.3657       | 291.1865         | T    | 1324.7008 | 662.8540        | 1307.6743      | 654.3408         | 1306.6902      | 653.8488         | 11 |
| 7  | 712.4604  | 356.7338        |                |                  | 694.4498       | 347.7285         | I    | 1223.6531 | 612.3302        | 1206.6266      | 603.8169         | 1205.6426      | 603.3249         | 10 |
| 8  | 825.5444  | 413.2758        |                |                  | 807.5339       | 404.2706         | L    | 1110.5691 | 555.7882        | 1093.5425      | 547.2749         | 1092.5585      | 546.7829         | 9  |
| 9  | 962.6033  | 481.8053        |                |                  | 944.5928       | 472.8000         | H    | 997.4850  | 499.2461        | 980.4585       | 490.7329         | 979.4744       | 490.2409         | 8  |
| 10 | 1090.6619 | 545.8346        | 1073.6354      | 537.3213         | 1072.6513      | 536.8293         | Q    | 860.4261  | 430.7167        | 843.3995       | 422.2034         | 842.4155       | 421.7114         | 7  |
| 11 | 1205.6889 | 603.3481        | 1188.6623      | 594.8348         | 1187.6783      | 594.3428         | D    | 732.3675  | 366.6874        | 715.3410       | 358.1741         | 714.3569       | 357.6821         | 6  |
| 12 | 1391.7682 | 696.3877        | 1374.7416      | 687.8744         | 1373.7576      | 687.3824         | W    | 617.3406  | 309.1739        | 600.3140       | 300.6606         |                |                  | 5  |
| 13 | 1504.8522 | 752.9298        | 1487.8257      | 744.4165         | 1486.8417      | 743.9245         | L    | 431.2613  | 216.1343        | 414.2347       | 207.6210         |                |                  | 4  |
| 14 | 1618.8952 | 809.9512        | 1601.8686      | 801.4379         | 1600.8846      | 800.9459         | N    | 318.1772  | 159.5922        | 301.1506       | 151.0790         |                |                  | 3  |
| 15 | 1675.9166 | 838.4619        | 1658.8901      | 829.9487         | 1657.9061      | 829.4567         | G    | 204.1343  | 102.5708        | 187.1077       | 94.0575          |                |                  | 2  |
| 16 |           |                 |                |                  |                |                  | K    | 147.1128  | 74.0600         | 130.0863       | 65.5468          |                |                  | 1  |
